# Supplementary material for: A myeloid program associated with COVID-19 severity is decreased by therapeutic blockade of IL-6 signaling
Source: PubMed Central journal article supplement — iScience. 2023 Sep 1;26(10):107813. doi: 10.1016/j.isci.2023.107813 (PMC10551843; doi:10.1016/j.isci.2023.107813), 2023-09-01
Supplement: mmc1.pdf [file mmc1.pdf]

## Supplemental information

### **A myeloid program associated with COVID-19**

**severity is decreased by therapeutic**

**blockade of IL-6 signaling**

**Jason A. Hackney, Haridha Shivram, Jason Vander Heiden, Chris Overall, Luz Orozco, Xia Gao, Eugene Kim, Nathan West, Aditi Qamra, Diana Chang, Arindam Chakrabarti, David F. Choy, Alexis J. Combes, Tristan Courau, Gabriela K. Fragiadakis, Arjun Arkal Rao, Arja Ray, Jessica Tsui, Kenneth Hu, Nicholas F. Kuhn, Matthew F. Krummel, David J. Erle, Kirsten Kangelaris, Aartik Sarma, Zoe Lyon, Carolyn S. Calfee, Prescott G. Woodruff, Rajani Ghale, Eran Mick, Ashley Byrne, Beth Shoshana Zha, Charles Langelier, Carolyn M. Hendrickson, Monique G.P. van der Wijst, George C. Hartoularos, Tianna Grant, Raymund Bueno, David S. Lee, John R. Greenland, Yang Sun, Richard Perez, Anton Ogorodnikov, Alyssa Ward, Chun Jimmie Ye, UCSF COMET Consortium, Thiru Ramalingam, Jacqueline M. McBride, Fang Cai, Anastasia Teterina, Min Bao, Larry Tsai, Ivan O. Rosas, Aviv Regev, Sharookh B. Kapadia, Rebecca N. Bauer, and Carrie M. Rosenberger**

## Supplemental Data

**Supplementary Figure 1. Further characterization of the EN-RAGE signature within PBMC and BAL, related to Figure 1.** A.) Expression of EN-RAGE signature in PBMC<sup>11</sup> single cell RNA-seq data. Left panel: UMAP projection of cells colored by cell types. Each point represents a single cell, and points are colored by annotated cell types. Middle panel: UMAP projection of cells colored by EN-RAGE signature score. Each point represents a single cell, colored by the signature score value. Right panel: pseudo-bulk expression profiles including non-myeloid cell types. Each point represents the pseudo-bulk signature score for a cell type in a patient sample. Blue=healthy (BAL n = 3; PBMC, n = 3), orange=moderate (BAL, n = 3; PBMC, n = 8; hospitalized +/- supplemental O<sub>2</sub>), red=critical (BAL, n = 6; PBMC, n = 10; requiring mechanical ventilation), with severity defined within each published dataset by the original authors. B.) EN-RAGE signature expression in BAL<sup>7</sup> single cell RNA-seq data. Left panel: UMAP project of cells colored by cell type. Middle panel: cells colored by expression of the EN-RAGE signature. Right panel: pseudo-bulk expression of EN-RAGE including non-myeloid cells; colored as in A above. (C-F). Heatmaps of ENRAGE (C-D) and MS1 (E-F) signature genes in pseudo-bulk expression profiles in BAL and PBMC. Each row is a gene, each column is a cell cluster. Each row is z-score normalized within each dataset. LDG=low density granulocytes.

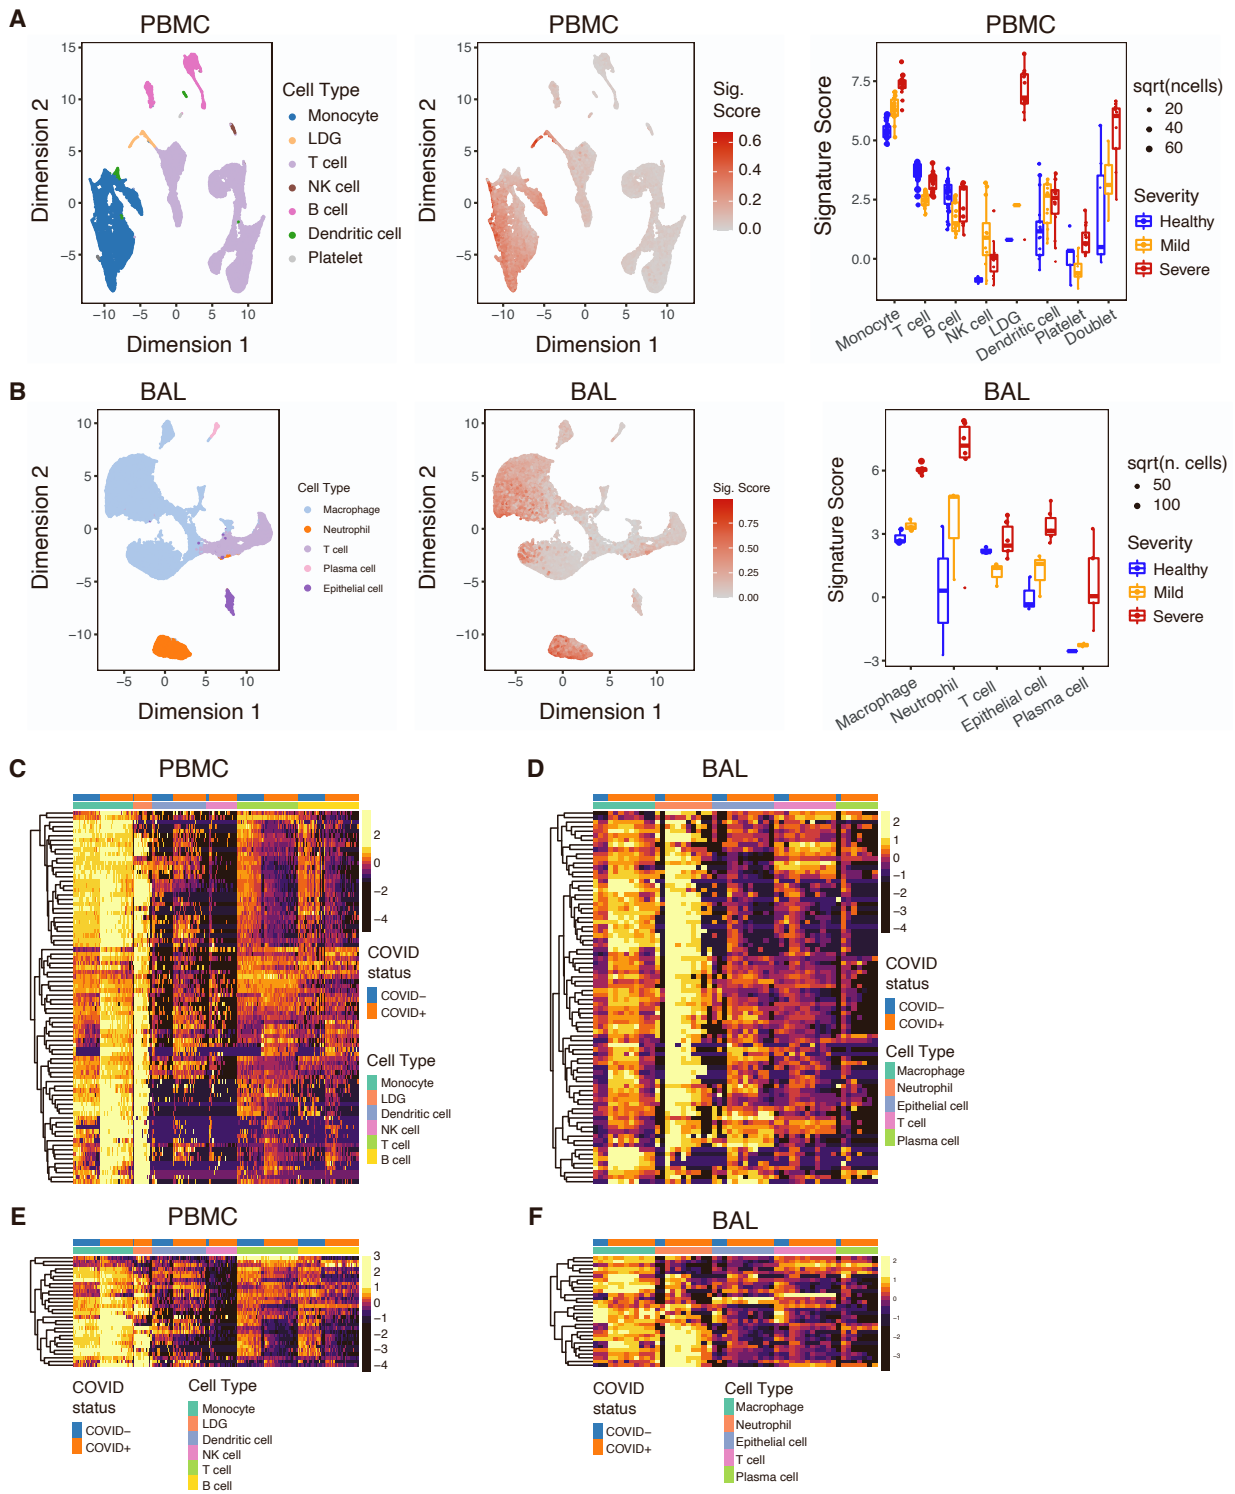

**Supplementary Figure 2. Expression of EN-RAGE signature, compared to the MS1 signature across multiple sample types from the COMET cohort, related to Figure 2. A.)** Pairwise Spearman correlation coefficients between genes within the EN-RAGE and MS1 gene signatures across three different compartments: ETA (n = 55), PBMC (n = 279), and whole blood (n = 245). B-E.) Heatmaps of gene expression (B-C) and pairwise gene correlations (D-E) of EN-RAGE and MS1 within the PBMC compartment. (11). F-I.) Heatmaps of gene expression (F-G) and pairwise gene correlations (H-I) of the whole blood compartment (11). J-M.) Heatmaps of gene expression (J-K) and pairwise gene correlations (L-M) of EN-RAGE and MS1 within the ETA compartment (7). Gene expression values were pseudobulked for each cell population (sample + cell type) and the pairwise Spearman correlation coefficients were calculated using the pseudobulked gene expression values. LDG=low-density granulocytes.

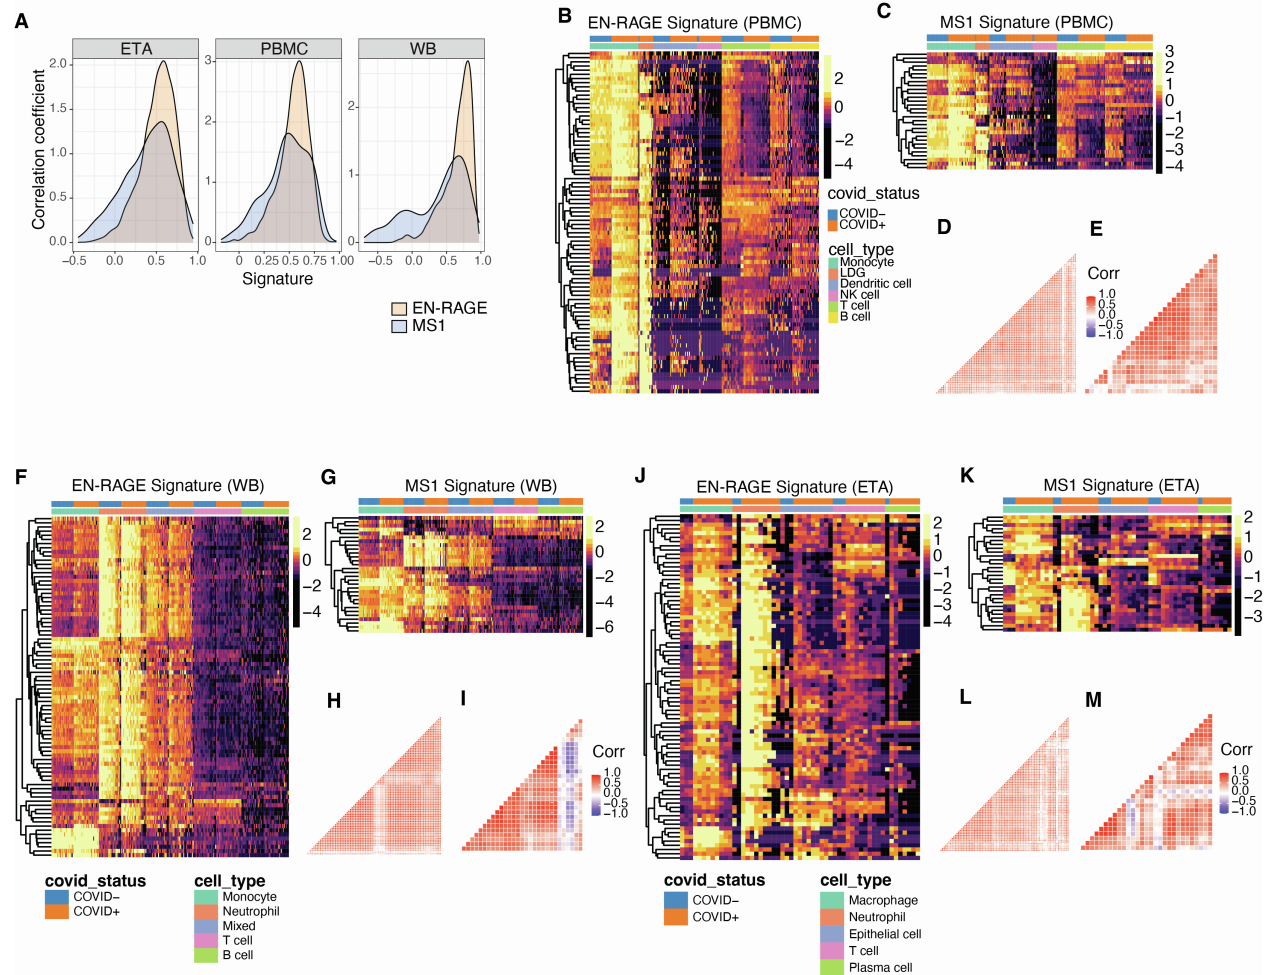



**Supplementary Figure 3. EN-RAGE gene set expression in PBMCs is associated with increased clinical severity and poor outcomes in the COMET cohort, related to Figure 3.** A.) Comparison of EN-RAGE signature in monocytes from patients admitted to ICU compared to those not. B-C.) Correlation between baseline pseudobulk EN-RAGE gene set expression in myeloid cells and (B) baseline NIH scale, and (C) maximal NIH scale (worst score recorded during hospitalization, excluding healthy controls). Each dot represents one patient, n=49. D-F.) Myeloid EN-RAGE gene set expression by ARDS diagnosis. D.) ARDS diagnosed using AECC criteria. E.) ARDS diagnosed using Berlin criteria. F.) Berlin ARDS subset by COVID-19 status. Boxes represent first and third quartiles, the centerline shows the median. Two-tailed t-test p-values are shown: n.s.= not significant, \*p<0.05, \*\*p<0.01. G.) Spearman correlation coefficients comparing unadjusted or baseline severity-adjusted EN-RAGE signature expression with clinical severity, outcomes, or plasma protein measures. To adjust for baseline severity, a linear model was fit between EN-RAGE expression and baseline NIH scale. Residuals from this model were then compared to each of the severity or protein measures. Correlation with NIH scale is meaningless in this context, so has been omitted.

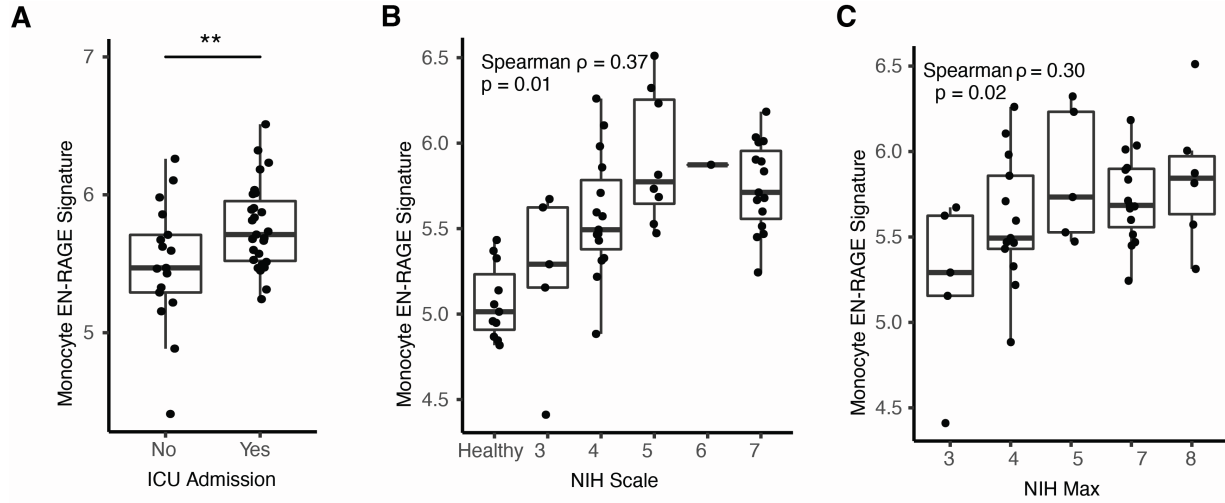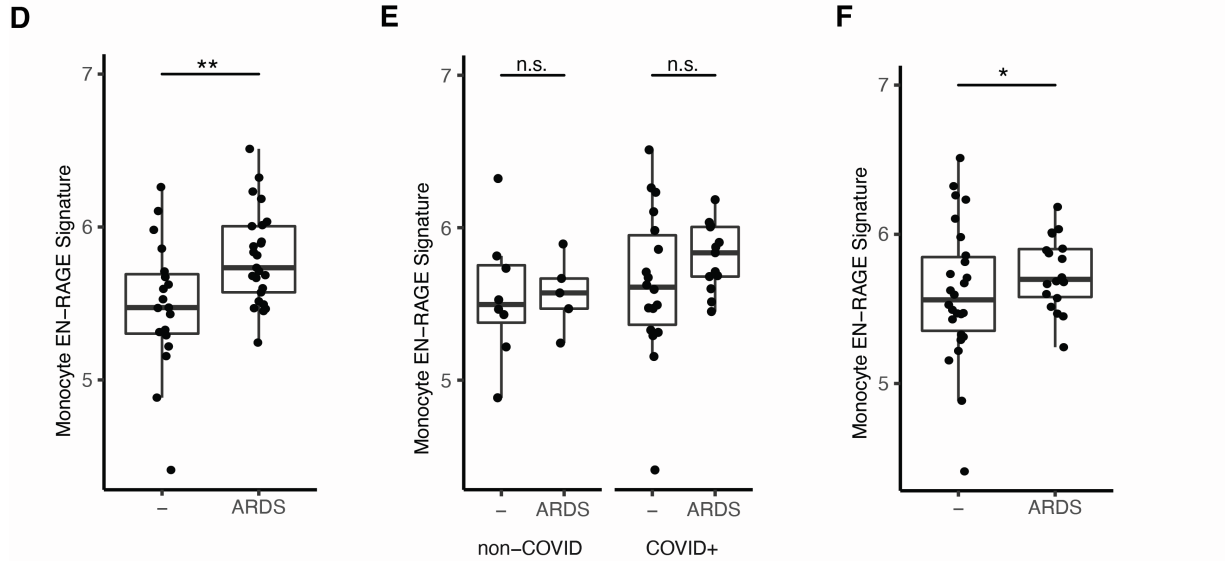

**G**

| PBMC              |   | Clinical severity |      | Clinical outcome |       | Plasma protein |       |
|-------------------|---|-------------------|------|------------------|-------|----------------|-------|
|                   |   | NIH               | SOFA | NIH MAX          | VFDS  | IL-6           | IL-10 |
| Unadjusted        | r | 0.37              | 0.22 | 0.30             | -0.25 | 0.41           | 0.29  |
|                   | p | 0.010             | 0.15 | 0.02             | 0.10  | 0.005          | 0.05  |
| Severity-adjusted | r | NA                | 0.03 | 0.20             | -0.08 | 0.3            | 0.28  |
|                   | p | NA                | 0.85 | 0.20             | 0.60  | 0.051          | 0.07  |

**Supplemental Figure 4. Comparison of EN-RAGE signature expression with T cell immunosuppression phenotypes in the COMET PBMC cohort, related to Figure 4. A-H.)** Pseudobulked surface protein expression in 128 PBMC samples from 60 patients over 14 days, grouped by clinical outcomes. A-D.) Expression in pseudobulked CD8<sup>+</sup> T cells. E-H.) Expression in pseudobulked CD4<sup>+</sup> T cells. Blue line denotes the linear regression trend for gene expression over time. Red line denotes the average expression level in 11 healthy controls. Vent. duration = days of mechanical ventilation in survivors. Pearson correlation coefficients (r) are indicated, stars represent significant correlations: \* =  $p < 0.05$ , \*\* =  $p < 0.01$ .

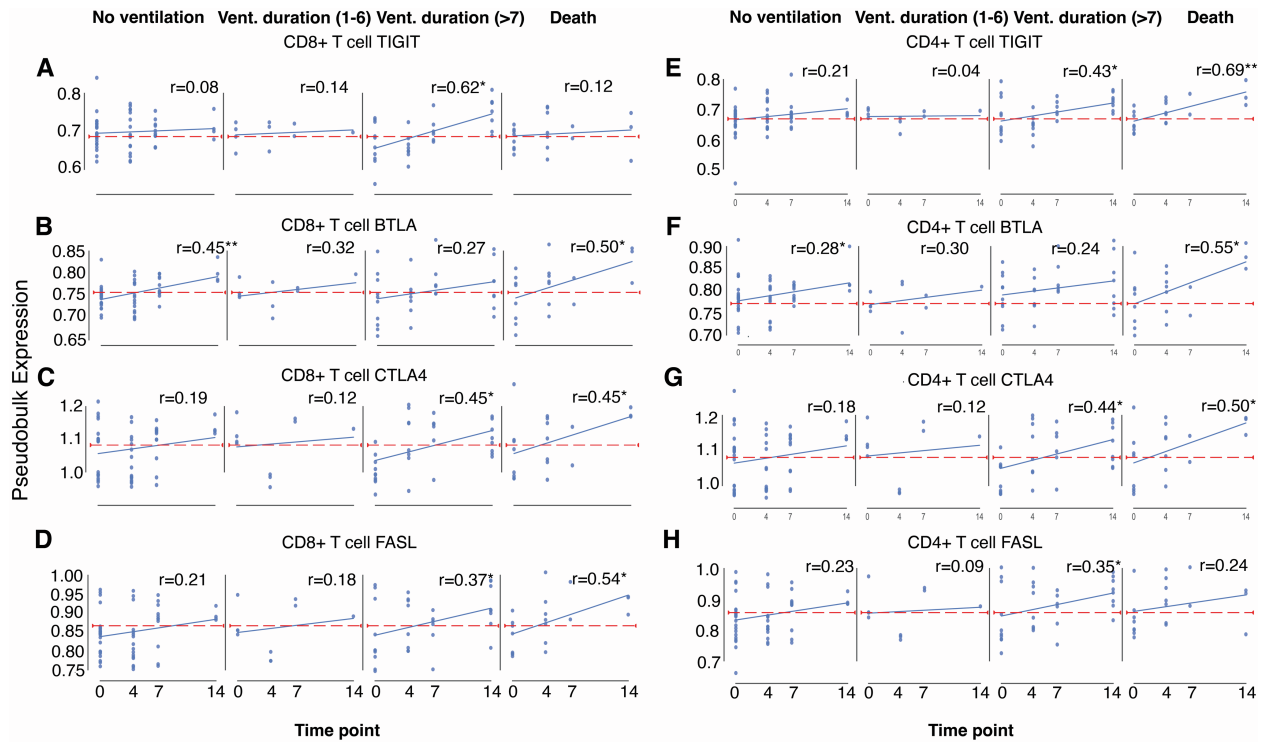

\* < 0.05; \*\* < 0.001

**Supplemental Figure 5. Myeloid and T cell gene sets are associated with poor outcome in COVID-19 patients and decreased following tocilizumab treatment, related to Figure 6.** A.) GSEA enrichments are consistent with those in Figure 6B-E for the ENRAGE gene set following adjustment for blood % monocytes, % neutrophils, or % lymphocytes. The effect of tocilizumab treatment is not affected by baseline tertile of serum IL-6 protein levels, with 1= lowest tertile and 3=highest tertile. GSEA are shown in red when  $FDR < 0.05$ . NES=normalized enrichment score. B.) Heatmap showing normalized expression of EN-RAGE gene set at baseline, day 3, 7, 14 and 28 for placebo (First 5 columns) and Tocilizumab treatment arms (Last 5 columns). C-D.) Box plots showing normalized expression of FCN1 (C) and IL1RN (D) for healthy controls and patients in placebo or Tocilizumab study arm at baseline, Day 3 and 7 faceted by their clinical status by day 28.

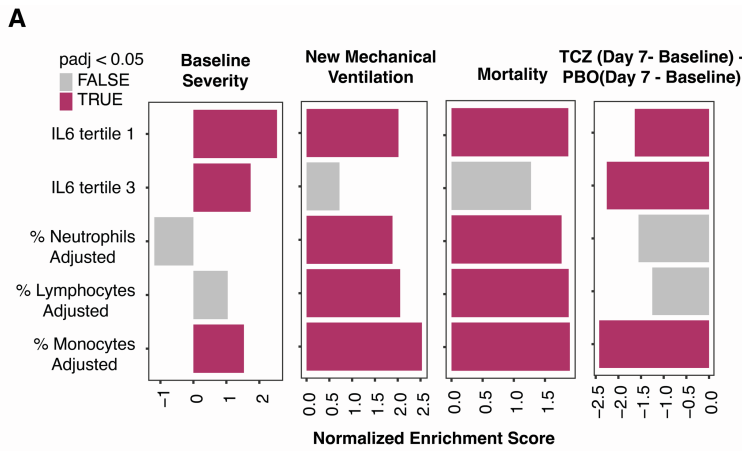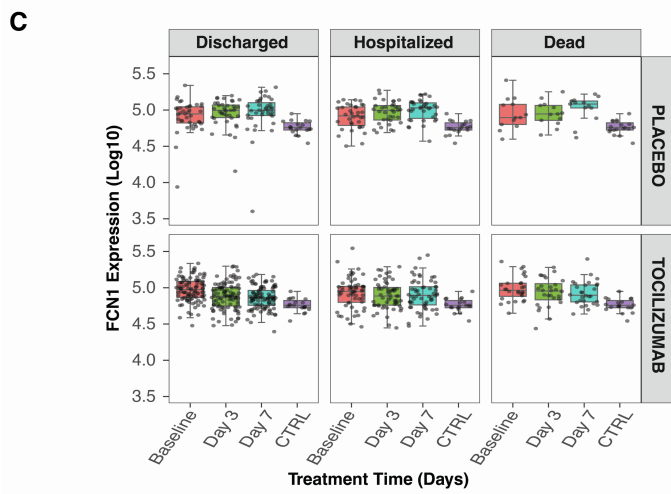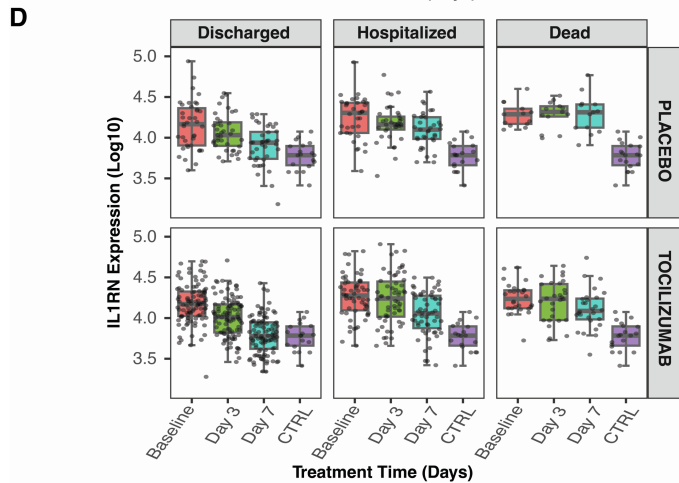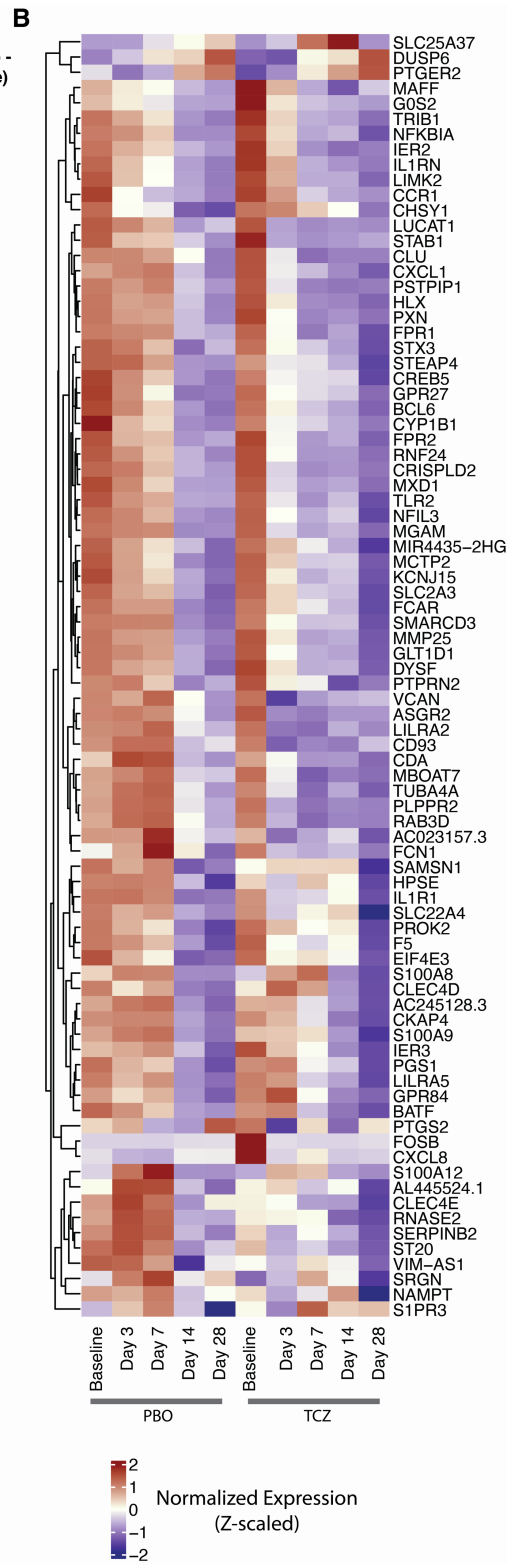

**Supplemental Figure 6. Tocilizumab modulates expression of blood myeloid and T cell signature genes and cell composition more than placebo over 7 days of treatment, related to Figure 6 and Figure 7.** A-D.) Signature scores are shown within each day, split by treatment arm and disease course and compared with healthy controls (CTRL). Patients are split into those that were discharged before D28, those who remained hospitalized, or subjects who died by day 28. Average signature scores are shown across the first 7 days of treatment for patients with measurements at all 3 time points. Tocilizumab treatment decreased expression of (A) EN-RAGE signature and increased expression of (B) CD8 T cell signature in survivors. Tocilizumab treatment decreased expression of (C) MS1 signature and increased expression of (D) CD4<sup>+</sup> T cell signature in survivors. E-J.) Tocilizumab normalizes blood cell composition more rapidly than placebo. Blood cell percentage (E-G) and absolute cell counts (H-J) are shown at baseline (pre-treatment) and D3 and D4-D10 (post-treatment); FDR calculated relative to baseline \* =  $p < 0.05$ , \*\* =  $p < 0.01$ , \*\*\* =  $p < 0.001$ , \*\*\*\* =  $p < 0.0001$ , ns = non-significant. Significance testing was performed using either t-test (A-D) or Wilcoxon rank-sum test (E-J). SOC = standard of care drug therapy. For box plots, each point represents a patient sample, center lines depict the median value, the bottom and top of the boxes show the first and third quartile, and whiskers show the most extreme point  $< 1.5 \times$  the interquartile range (IQR) from the bottom or top of the box.



**Supplemental Figure 7. Effect of tocilizumab on blood cell counts and serum protein levels relative to ENRAGE gene set expression Day 7 vs baseline, related to Figure 7.** A.) Correlation of blood ENRAGE gene set expression with serum proteins and blood cell counts at baseline prior to treatment. IL-10 was measured by Protein Simple and IL-1 $\beta$ , ENRAGE, and Arg1 were measured by Olink. B-H.) Spearman correlations between change in blood ENRAGE gene set expression and change in blood cell counts (B-D) and serum proteins (E-H) between baseline and D7. Each dot represents a patient with available samples at baseline and D7, SOC = standard of care drug therapy.

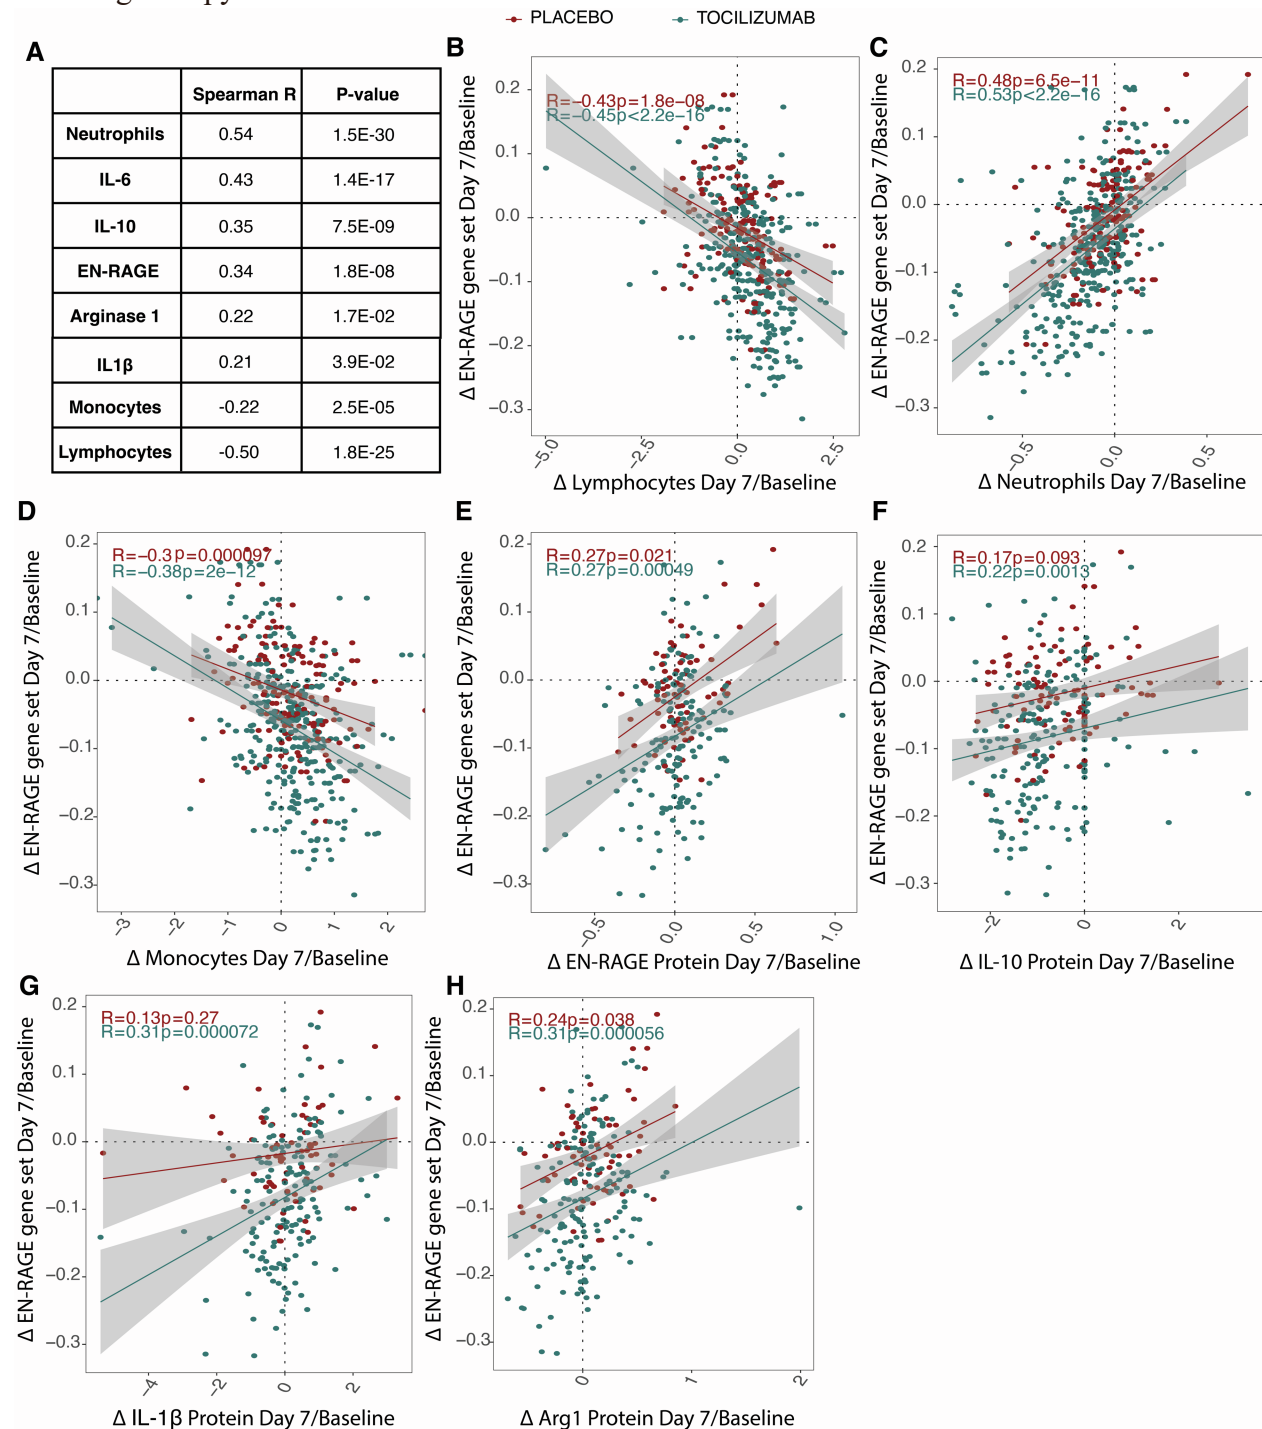



**Supplemental Table 1. Definition of the EN-RAGE gene set, related to Figure 1.**

| ID              | Gene symbol |
|-----------------|-------------|-----------------|-------------|-----------------|-------------|-----------------|-------------|
| ENSG00000276900 | AC023157.3  | ENSG00000163412 | EIF4E3      | ENSG00000248323 | LUCAT1      | ENSG00000101236 | RNF24       |
| ENSG00000268734 | AC245128.3  | ENSG00000198734 | F5          | ENSG00000185022 | MAFF        | ENSG00000163221 | S100A12     |
| ENSG00000233461 | AL445524.1  | ENSG00000186431 | FCAR        | ENSG00000125505 | MBOAT7      | ENSG00000143546 | S100A8      |
| ENSG00000161944 | ASGR2       | ENSG00000085265 | FCN1        | ENSG00000140563 | MCTP2       | ENSG00000163220 | S100A9      |
| ENSG00000156127 | BATF        | ENSG00000125740 | FOSB        | ENSG00000257335 | MGAM        | ENSG00000213694 | S1PR3       |
| ENSG00000113916 | BCL6        | ENSG00000171051 | FPR1        | ENSG00000172965 | MIR4435-2HG | ENSG00000155307 | SAMSN1      |
| ENSG00000163823 | CCR1        | ENSG00000171049 | FPR2        | ENSG00000008516 | MMP25       | ENSG00000197632 | SERPINB2    |
| ENSG00000123810 | CD93        | ENSG00000123689 | GOS2        | ENSG00000059728 | MXD1        | ENSG00000197208 | SLC22A4     |
| ENSG00000158825 | CDA         | ENSG00000151948 | GLT1D1      | ENSG00000105835 | NAMPT       | ENSG00000147454 | SLC25A37    |
| ENSG00000131873 | CHSY1       | ENSG00000170837 | GPR27       | ENSG00000165030 | NFIL3       | ENSG00000059804 | SLC2A3      |
| ENSG00000136026 | CKAP4       | ENSG00000139572 | GPR84       | ENSG00000100906 | NFKBIA      | ENSG00000082014 | SMARCD3     |
| ENSG00000166527 | CLECAD      | ENSG00000136630 | HLX         | ENSG00000087157 | PGS1        | ENSG00000122862 | SRGN        |
| ENSG00000166523 | CLEC4E      | ENSG00000173083 | HPSE        | ENSG00000105520 | PLPPR2      | ENSG00000180953 | ST20        |
| ENSG00000120885 | CLU         | ENSG00000160888 | IER2        | ENSG00000163421 | PROK2       | ENSG00000010327 | STAB1       |
| ENSG00000146592 | CREB5       | ENSG00000137331 | IER3        | ENSG00000140368 | PSTPIP1     | ENSG00000127954 | STEAP4      |
| ENSG00000103196 | CRISPLD2    | ENSG00000115594 | IL1R1       | ENSG00000125384 | PTGER2      | ENSG00000166900 | STX3        |
| ENSG00000163739 | CXCL1       | ENSG00000136689 | IL1RN       | ENSG00000073756 | PTGS2       | ENSG00000137462 | TLR2        |
| ENSG00000169429 | CXCL8       | ENSG00000157551 | KCNJ15      | ENSG00000155093 | PTPRN2      | ENSG00000173334 | TRIB1       |
| ENSG00000138061 | CYP1B1      | ENSG00000239998 | LILRA2      | ENSG00000089159 | PXN         | ENSG00000127824 | TUBA4A      |
| ENSG00000139318 | DUSP6       | ENSG00000187116 | LILRA5      | ENSG00000105514 | RAB3D       | ENSG00000038427 | VCAN        |
| ENSG00000135636 | DYSF        | ENSG00000182541 | LIMK2       | ENSG00000169385 | RNASE2      | ENSG00000229124 | VIM-AS1     |

**Supplementary Table 2. Reproducibility of EN-RAGE+ myeloid cell gene expression across cohorts and sample types, related to Figure 3.** Spearman correlation coefficients are shown for pseudo-bulk EN-RAGE signature score and genes encoding myeloid functions within specific myeloid populations across scRNA-seq datasets. Positive correlations are shaded red and negative correlations shaded blue, with increasing darkness of shading indicating two tailed p values of  $p < 0.05$ ,  $p < 0.01$ , and  $p < 0.001$ . TA=tracheal aspirate, BAL=bronchoalveolar lavage. Blanks indicate transcript in below detection. Datasets: Liao et al.<sup>7</sup>, Grant et al.<sup>6</sup>, Delorey et al.<sup>5</sup>, Schulte-Schrepping et al.<sup>11</sup>, Silvin et al.<sup>12</sup>, COMET PBMC<sup>2</sup>, whole blood<sup>39</sup>, and ETA<sup>38</sup>.

| Spearman rho             |                      | HLA.DRA         | HLA.DRB1 | CD14  | STAT3 | S100A12 | S100A9 | IL10 | PDL1 | PTGER2 | TGFB1 | IL1B  | IDO1  | CCR5  | CYBB  | ARG1  | CCR2  |       |
|--------------------------|----------------------|-----------------|----------|-------|-------|---------|--------|------|------|--------|-------|-------|-------|-------|-------|-------|-------|-------|
| Airway samples           | <b>Monocyte</b>      | n               |          |       |       |         |        |      |      |        |       |       |       |       |       |       |       |       |
|                          | TA MonoMac COMET     | 41              | 0.11     | -0.23 | 0.10  | 0.75    | 0.70   | 0.76 | 0.74 | 0.59   | 0.72  | 0.13  | 0.86  | 0.33  | 0.36  | 0.14  | 0.31  | 0.26  |
|                          | BAL monocyte Liao    | 12              | -0.90    | -0.97 | 0.73  | 0.71    | 0.92   | 0.38 | 0.82 | 0.58   | 0.89  | 0.89  | 0.74  | 0.69  | 0.80  | 0.07  |       | 0.73  |
|                          | BAL myeloid Grant    | 19              | 0.52     | 0.43  | 0.41  | 0.48    | 0.53   | 0.16 | 0.36 | 0.47   | 0.66  | 0.29  | 0.47  | 0.34  | 0.37  | 0.06  |       | -0.05 |
|                          | BAL macrophage Grant | 19              | -0.26    | -0.33 | 0.32  | 0.83    | 0.93   | 0.89 | 0.65 | 0.76   | 0.81  | 0.38  | 0.55  | 0.61  | 0.46  | -0.19 | 0.30  | 0.15  |
|                          | Lung myeloid Delorey | 24              | -0.01    | 0.00  | -0.02 | 0.65    | 0.76   | 0.32 | 0.77 | 0.85   | 0.74  | 0.29  | 0.87  | 0.65  | 0.43  | -0.15 | 0.53  | 0.28  |
|                          | <b>Neutrophil</b>    |                 |          |       |       |         |        |      |      |        |       |       |       |       |       |       |       |       |
|                          | TA neutrophil COMET  | 40              | 0.05     | -0.16 | 0.58  | 0.63    | 0.74   | 0.85 | 0.53 | 0.61   | 0.35  | 0.54  | 0.78  | 0.30  | -0.02 | 0.21  | 0.59  | -0.09 |
|                          | BAL neutrophil Liao  | 11              | 0.34     | 0.35  | 0.82  | 0.84    | 0.89   | 0.96 |      | 0.99   | 0.87  | 0.96  | 0.83  | 0.93  | 0.80  | 0.85  |       | 0.15  |
|                          | Blood samples        | <b>Monocyte</b> | n        |       |       |         |        |      |      |        |       |       |       |       |       |       |       |       |
| Blood monocyte COMET     |                      | 18              | -0.01    | 0.19  | 0.62  | 0.79    | 0.67   | 0.74 | 0.57 | 0.31   | 0.52  | 0.37  | 0.34  | 0.37  | 0.07  | 0.60  | 0.43  | 0.53  |
| Blood monocyte Schulte   |                      | 33              | -0.54    | -0.41 | 0.81  | 0.75    | 0.67   | 0.67 | 0.05 | 0.27   | 0.51  | 0.36  | -0.16 | 0.09  | 0.05  | 0.56  | -0.01 | 0.23  |
| Blood monocyte Silvin    |                      | 6               | -0.77    | -0.89 | 0.94  | 0.54    | 1.00   | 0.77 |      | 0.68   | -0.03 | 0.31  | -0.43 |       | 0.43  | 0.94  |       | 0.60  |
| PBMC monocyte COMET      |                      | 44              | -0.45    | -0.48 | 0.65  | 0.15    | 0.73   | 0.79 | 0.15 | 0.02   | 0.38  | 0.18  | 0.34  | -0.08 | -0.44 | 0.52  | -0.09 | 0.25  |
| PBMC monocyte Schulte    |                      | 16              | -0.73    | -0.54 | 0.75  | 0.86    | 0.57   | 0.71 | 0.66 | 0.43   | 0.77  | -0.20 | 0.64  | 0.02  | -0.40 | 0.40  | 0.65  | -0.56 |
| <b>Neutrophil</b>        |                      |                 |          |       |       |         |        |      |      |        |       |       |       |       |       |       |       |       |
| Blood neutrophil COMET   |                      | 18              | -0.53    | -0.52 | 0.78  | 0.94    | 0.72   | 0.87 | 0.30 | 0.78   | -0.48 | 0.91  | 0.70  | 0.37  | 0.06  | 0.28  | 0.77  | -0.21 |
| Blood neutrophil Schulte |                      | 33              | -0.23    | -0.05 | 0.71  | 0.79    | 0.57   | 0.62 |      | 0.50   | 0.22  | 0.80  | -0.08 |       | 0.33  | 0.19  | 0.19  | -0.01 |
| Blood neutrophil Silvin  |                      | 6               | -0.37    | -0.77 | 1.00  | 0.20    | 1.00   | 0.94 |      | 0.60   | 0.82  | 0.60  | -0.03 |       |       | -0.09 | 0.54  | -0.85 |
| PBMC neutrophil Schulte  | 16                   | 0.21            | 0.46     | 0.54  | 0.74  | 0.63    | 0.68   |      | 0.62 | -0.11  | 0.91  | 0.80  | 0.55  |       | 0.23  | 0.47  |       |       |

**Supplementary Table 3. Differential expression analysis of IL-6 treated monocytes, related to Figure 5.** Summary statistics (log2 fold change, p-value and FDR) are shown for genes identified in the EN-RAGE signature, myeloid function genes, and T cell modulatory genes.

| ID              | Symbol     | Gene Name                                                                                       | P-Value    | FDR        | Log2 Fold Change |
|-----------------|------------|-------------------------------------------------------------------------------------------------|------------|------------|------------------|
| ENSG00000276900 | AC023157.3 | NA                                                                                              | 0.0002558  | 0.00688289 | -0.946526        |
| ENSG00000268734 | AC245128.3 | NA                                                                                              | 0.00068357 | 0.01282159 | 1.37033234       |
| ENSG00000233461 | AL445524.1 | NA                                                                                              | 0.00011969 | 0.00434596 | 1.11062331       |
| ENSG00000161944 | ASGR2      | asialoglycoprotein receptor 2 [Source:HGNC Symbol;Acc:HGNC:743]                                 | 0.00101507 | 0.01623308 | 0.7888026        |
| ENSG00000156127 | BATF       | basic leucine zipper ATF-like transcription factor [Source:HGNC Symbol;Acc:HGNC:958]            | 2.25E-05   | 0.00154798 | 0.77230429       |
| ENSG00000113916 | BCL6       | B-cell CLL/lymphoma 6 [Source:HGNC Symbol;Acc:HGNC:1001]                                        | 0.34096017 | 0.59700076 | 0.30265759       |
| ENSG00000163823 | CCR1       | C-C motif chemokine receptor 1 [Source:HGNC Symbol;Acc:HGNC:1602]                               | 0.0002279  | 0.00639216 | 1.11822664       |
| ENSG00000125810 | CD93       | CD93 molecule [Source:HGNC Symbol;Acc:HGNC:15855]                                               | 0.00675866 | 0.05468667 | 0.56329649       |
| ENSG00000158825 | CDA        | cytidine deaminase [Source:HGNC Symbol;Acc:HGNC:1712]                                           | 0.08780946 | 0.27327715 | -0.6961891       |
| ENSG00000131873 | CHSY1      | chondroitin sulfate synthase 1 [Source:HGNC Symbol;Acc:HGNC:17198]                              | 0.05249982 | 0.20065662 | 0.52522326       |
| ENSG00000136026 | CKAP4      | cytoskeleton associated protein 4 [Source:HGNC Symbol;Acc:HGNC:16991]                           | 0.25426105 | 0.50725658 | 0.18099133       |
| ENSG00000166527 | CLEC4D     | C-type lectin domain family 4 member D [Source:HGNC Symbol;Acc:HGNC:14554]                      | 3.80E-05   | 0.00213636 | 1.29276817       |
| ENSG00000166523 | CLEC4E     | C-type lectin domain family 4 member E [Source:HGNC Symbol;Acc:HGNC:14555]                      | 0.00062178 | 0.01211745 | 0.66621281       |
| ENSG00000120885 | CLU        | clusterin [Source:HGNC Symbol;Acc:HGNC:2095]                                                    | 0.25681528 | 0.51016731 | -0.7074343       |
| ENSG00000146592 | CREB5      | cAMP responsive element binding protein 5 [Source:HGNC Symbol;Acc:HGNC:16844]                   | 0.00034248 | 0.00829596 | 0.95498353       |
| ENSG00000103196 | CRISPLD2   | cysteine rich secretory protein LCCL domain containing 2 [Source:HGNC Symbol;Acc:HGNC:25248]    | 0.9550075  | 0.98294597 | 0.02830623       |
| ENSG00000163739 | CXCL1      | C-X-C motif chemokine ligand 1 [Source:HGNC Symbol;Acc:HGNC:4602]                               | 0.09385064 | 0.28517184 | 1.09058755       |
| ENSG00000169429 | CXCL8      | C-X-C motif chemokine ligand 8 [Source:HGNC Symbol;Acc:HGNC:6025]                               | 0.15309532 | 0.38208223 | -0.8591684       |
| ENSG00000138061 | CYP1B1     | cytochrome P450 family 1 subfamily B member 1 [Source:HGNC Symbol;Acc:HGNC:2597]                | 0.057066   | 0.21144762 | 0.2970168        |
| ENSG00000139318 | DUSP6      | dual specificity phosphatase 6 [Source:HGNC Symbol;Acc:HGNC:3072]                               | 0.0019424  | 0.02504931 | 0.6022381        |
| ENSG00000135636 | DYSF       | dysferlin [Source:HGNC Symbol;Acc:HGNC:3097]                                                    | 0.12850349 | 0.34489034 | 1.04938142       |
| ENSG00000163412 | EIF4E3     | eukaryotic translation initiation factor 4E family member 3 [Source:HGNC Symbol;Acc:HGNC:31837] | 0.01868306 | 0.10516259 | 0.51182583       |
| ENSG00000198734 | F5         | coagulation factor V [Source:HGNC Symbol;Acc:HGNC:3542]                                         | 0.04059769 | 0.17130637 | 1.13549923       |
| ENSG00000186431 | FCAR       | Fc fragment of IgA receptor [Source:HGNC Symbol;Acc:HGNC:3608]                                  | 0.00120478 | 0.01823671 | 1.2267336        |
| ENSG00000085265 | FCN1       | ficolin 1 [Source:HGNC Symbol;Acc:HGNC:3623]                                                    | 0.91792301 | 0.96843436 | -0.0132796       |
| ENSG00000125740 | FOSB       | FosB proto-oncogene, AP-1 transcription factor subunit [Source:HGNC Symbol;Acc:HGNC:3797]       | 0.00057552 | 0.01150973 | -1.5571324       |
| ENSG00000171051 | FPR1       | formyl peptide receptor 1 [Source:HGNC Symbol;Acc:HGNC:3826]                                    | 0.00214927 | 0.02687908 | 2.46797774       |
| ENSG00000171049 | FPR2       | formyl peptide receptor 2 [Source:HGNC Symbol;Acc:HGNC:3827]                                    | 7.16E-05   | 0.0031548  | 2.95300415       |
| ENSG00000123689 | G0S2       | G0/G1 switch 2 [Source:HGNC Symbol;Acc:HGNC:30229]                                              | 0.03136987 | 0.14585339 | 1.04079477       |
| ENSG00000151948 | GLT1D1     | glycosyltransferase 1 domain containing 1 [Source:HGNC Symbol;Acc:HGNC:26483]                   | 4.52E-07   | 0.00015703 | 0.86549295       |
| ENSG00000170837 | GPR27      | G protein-coupled receptor 27 [Source:HGNC Symbol;Acc:HGNC:4482]                                | 0.24301613 | 0.49524341 | 0.97088636       |
| ENSG00000139572 | GPR84      | G protein-coupled receptor 84 [Source:HGNC Symbol;Acc:HGNC:4535]                                | 0.4274837  | 0.67643793 | 0.13717464       |
| ENSG00000136630 | HLX        | H2.0 like homeobox [Source:HGNC Symbol;Acc:HGNC:4978]                                           | 0.63656708 | 0.82485607 | 0.16023166       |
| ENSG00000173083 | HPSE       | heparanase [Source:HGNC Symbol;Acc:HGNC:5164]                                                   | 0.00229917 | 0.02804157 | 0.63249147       |

|                 |             |                                                                                               |            |            |            |
|-----------------|-------------|-----------------------------------------------------------------------------------------------|------------|------------|------------|
| ENSG00000160888 | IER2        | immediate early response 2 [Source:HGNC Symbol;Acc:HGNC:28871]                                | 0.87002609 | 0.94693555 | 0.02568598 |
| ENSG00000137331 | IER3        | immediate early response 3 [Source:HGNC Symbol;Acc:HGNC:5392]                                 | 0.01223604 | 0.08091413 | 0.83494161 |
| ENSG00000115594 | IL1R1       | interleukin 1 receptor type 1 [Source:HGNC Symbol;Acc:HGNC:5993]                              | 0.41204952 | 0.66304842 | 0.15820301 |
| ENSG00000136689 | IL1RN       | interleukin 1 receptor antagonist [Source:HGNC Symbol;Acc:HGNC:6000]                          | 0.57218936 | 0.78432026 | 0.23559381 |
| ENSG00000157551 | KCNJ15      | potassium voltage-gated channel subfamily J member 15 [Source:HGNC Symbol;Acc:HGNC:6261]      | 6.28E-06   | 0.00074343 | 1.75942985 |
| ENSG00000239998 | LILRA2      | leukocyte immunoglobulin like receptor A2 [Source:HGNC Symbol;Acc:HGNC:6603]                  | 0.03706315 | 0.16193569 | 0.24452248 |
| ENSG00000187116 | LILRA5      | leukocyte immunoglobulin like receptor A5 [Source:HGNC Symbol;Acc:HGNC:16309]                 | 3.45E-05   | 0.00202174 | 1.69784191 |
| ENSG00000182541 | LIMK2       | LIM domain kinase 2 [Source:HGNC Symbol;Acc:HGNC:6614]                                        | 7.24E-06   | 0.00080663 | 0.97543978 |
| ENSG00000248323 | LUCAT1      | lung cancer associated transcript 1 (non-protein coding) [Source:HGNC Symbol;Acc:HGNC:48498]  | 0.1459313  | 0.37162743 | 0.33464446 |
| ENSG00000185022 | MAFF        | MAF bZIP transcription factor F [Source:HGNC Symbol;Acc:HGNC:6780]                            | 0.1380025  | 0.35875242 | -0.7571991 |
| ENSG00000125505 | MBOAT7      | membrane bound O-acyltransferase domain containing 7 [Source:HGNC Symbol;Acc:HGNC:15505]      | 9.86E-06   | 0.00095036 | 0.89812172 |
| ENSG00000140563 | MCTP2       | multiple C2 and transmembrane domain containing 2 [Source:HGNC Symbol;Acc:HGNC:25636]         | 4.51E-05   | 0.00234434 | 1.51782517 |
| ENSG00000257335 | MGAM        | maltase-glucoamylase [Source:HGNC Symbol;Acc:HGNC:7043]                                       | 0.22226083 | 0.47035084 | -0.2806996 |
| ENSG00000172965 | MIR4435-2HG | MIR4435-2 host gene [Source:HGNC Symbol;Acc:HGNC:35163]                                       | 0.03076242 | 0.14425059 | -0.7820365 |
| ENSG00000008516 | MMP25       | matrix metalloproteinase 25 [Source:HGNC Symbol;Acc:HGNC:14246]                               | 0.34632146 | 0.60227409 | 0.24510192 |
| ENSG00000059728 | MXD1        | MAX dimerization protein 1 [Source:HGNC Symbol;Acc:HGNC:6761]                                 | 1.30E-07   | 7.39E-05   | 1.71771187 |
| ENSG00000105835 | NAMPT       | nicotinamide phosphoribosyltransferase [Source:HGNC Symbol;Acc:HGNC:30092]                    | 1.42E-07   | 7.39E-05   | 1.8905536  |
| ENSG00000165030 | NFIL3       | nuclear factor, interleukin 3 regulated [Source:HGNC Symbol;Acc:HGNC:7787]                    | 0.69490948 | 0.85894369 | 0.08469961 |
| ENSG00000100906 | NFKBIA      | NFKB inhibitor alpha [Source:HGNC Symbol;Acc:HGNC:7797]                                       | 0.15140542 | 0.37964501 | 0.2329592  |
| ENSG00000087157 | PGS1        | phosphatidylglycerophosphate synthase 1 [Source:HGNC Symbol;Acc:HGNC:30029]                   | 2.98E-05   | 0.00181119 | 0.5554646  |
| ENSG00000105520 | PLPPR2      | phospholipid phosphatase related 2 [Source:HGNC Symbol;Acc:HGNC:29566]                        | 0.00670735 | 0.05430312 | 0.47712892 |
| ENSG00000163421 | PROK2       | prokineticin 2 [Source:HGNC Symbol;Acc:HGNC:18455]                                            | 0.06829251 | 0.2364142  | 1.31956596 |
| ENSG00000140368 | PSTPIP1     | proline-serine-threonine phosphatase interacting protein 1 [Source:HGNC Symbol;Acc:HGNC:9580] | 0.15621382 | 0.38693619 | -0.1396252 |
| ENSG00000125384 | PTGER2      | prostaglandin E receptor 2 [Source:HGNC Symbol;Acc:HGNC:9594]                                 | 0.00054456 | 0.0110989  | 0.90132869 |
| ENSG00000073756 | PTGS2       | prostaglandin-endoperoxide synthase 2 [Source:HGNC Symbol;Acc:HGNC:9605]                      | 0.02402345 | 0.12330904 | 0.50030344 |
| ENSG00000155093 | PTPRN2      | protein tyrosine phosphatase, receptor type N2 [Source:HGNC Symbol;Acc:HGNC:9677]             | 0.1438039  | 0.36808873 | -1.4315168 |
| ENSG00000089159 | PXN         | paxillin [Source:HGNC Symbol;Acc:HGNC:9718]                                                   | 9.72E-06   | 0.00094201 | 1.03358085 |
| ENSG00000105514 | RAB3D       | RAB3D, member RAS oncogene family [Source:HGNC Symbol;Acc:HGNC:9779]                          | 0.05566382 | 0.20791312 | 0.46673696 |
| ENSG00000169385 | RNASE2      | ribonuclease A family member 2 [Source:HGNC Symbol;Acc:HGNC:10045]                            | 0.04112826 | 0.17267452 | 0.82801537 |
| ENSG00000101236 | RNF24       | ring finger protein 24 [Source:HGNC Symbol;Acc:HGNC:13779]                                    | 0.64963761 | 0.8322104  | 0.03995637 |
| ENSG00000163221 | S100A12     | S100 calcium binding protein A12 [Source:HGNC Symbol;Acc:HGNC:10489]                          | 0.00025289 | 0.00683886 | 1.24344981 |
| ENSG00000143546 | S100A8      | S100 calcium binding protein A8 [Source:HGNC Symbol;Acc:HGNC:10498]                           | 8.09E-05   | 0.00343381 | 0.85722886 |
| ENSG00000163220 | S100A9      | S100 calcium binding protein A9 [Source:HGNC Symbol;Acc:HGNC:10499]                           | 1.38E-07   | 7.39E-05   | 1.63614409 |

|                 |          |                                                                                                                                       |            |            |            |
|-----------------|----------|---------------------------------------------------------------------------------------------------------------------------------------|------------|------------|------------|
| ENSG00000213694 | S1PR3    | sphingosine-1-phosphate receptor 3 [Source:HGNC Symbol;Acc:HGNC:3167]                                                                 | 0.43363103 | 0.68202843 | 0.53490736 |
| ENSG00000155307 | SAMSN1   | SAM domain, SH3 domain and nuclear localization signals 1 [Source:HGNC Symbol;Acc:HGNC:10528]                                         | 0.00018746 | 0.00568941 | 0.44680548 |
| ENSG00000197632 | SERPINB2 | serpin family B member 2 [Source:HGNC Symbol;Acc:HGNC:8584]                                                                           | 0.00829877 | 0.06226309 | 1.8308051  |
| ENSG00000197208 | SLC22A4  | solute carrier family 22 member 4 [Source:HGNC Symbol;Acc:HGNC:10968]                                                                 | 0.42821242 | 0.67691335 | 0.22695657 |
| ENSG00000147454 | SLC25A37 | solute carrier family 25 member 37 [Source:HGNC Symbol;Acc:HGNC:29786]                                                                | 0.23118103 | 0.48141237 | 0.23100506 |
| ENSG00000059804 | SLC2A3   | solute carrier family 2 member 3 [Source:HGNC Symbol;Acc:HGNC:11007]                                                                  | 8.15E-05   | 0.00344058 | 1.43809499 |
| ENSG00000082014 | SMARCD3  | SWI/SNF related, matrix associated, actin dependent regulator of chromatin, subfamily d, member 3 [Source:HGNC Symbol;Acc:HGNC:11108] | 0.00012868 | 0.00451911 | 0.87426808 |
| ENSG00000122862 | SRGN     | serglycin [Source:HGNC Symbol;Acc:HGNC:9361]                                                                                          | 0.00450854 | 0.04210837 | 0.35254964 |
| ENSG00000180953 | ST20     | suppressor of tumorigenicity 20 [Source:HGNC Symbol;Acc:HGNC:33520]                                                                   | 0.48338386 | 0.72221243 | 0.19612312 |
| ENSG00000010327 | STAB1    | stabilin 1 [Source:HGNC Symbol;Acc:HGNC:18628]                                                                                        | 0.0238392  | 0.12274581 | 0.32872072 |
| ENSG00000127954 | STEAP4   | STEAP4 metalloendopeptidase [Source:HGNC Symbol;Acc:HGNC:21923]                                                                       | 0.0031347  | 0.03384836 | 2.41419201 |
| ENSG00000166900 | STX3     | syntaxin 3 [Source:HGNC Symbol;Acc:HGNC:11438]                                                                                        | 0.48226411 | 0.72124343 | 0.05193184 |
| ENSG00000137462 | TLR2     | toll like receptor 2 [Source:HGNC Symbol;Acc:HGNC:11848]                                                                              | 0.00354142 | 0.03629353 | 0.37560024 |
| ENSG00000173334 | TRIB1    | tribbles pseudokinase 1 [Source:HGNC Symbol;Acc:HGNC:16891]                                                                           | 0.01676227 | 0.09806768 | 0.77869291 |
| ENSG00000127824 | TUBA4A   | tubulin alpha 4a [Source:HGNC Symbol;Acc:HGNC:12407]                                                                                  | 0.13874694 | 0.36006242 | 0.43569793 |
| ENSG00000038427 | VCAN     | versican [Source:HGNC Symbol;Acc:HGNC:2464]                                                                                           | 3.74E-08   | 3.39E-05   | 1.84828714 |
| ENSG00000229124 | VIM-AS1  | VIM antisense RNA 1 [Source:HGNC Symbol;Acc:HGNC:44879]                                                                               | 0.29642929 | 0.55244352 | 0.10496826 |
| ENSG00000120217 | CD274    | CD274 molecule [Source:HGNC Symbol;Acc:HGNC:17635]                                                                                    | 0.19742761 | 0.44184669 | 0.58942095 |
| ENSG00000204287 | HLA-DRA  | major histocompatibility complex, class II, DR alpha [Source:HGNC Symbol;Acc:HGNC:4947]                                               | 0.00472144 | 0.04334815 | 0.34541003 |
| ENSG00000121807 | CCR2     | C-C motif chemokine receptor 2 [Source:HGNC Symbol;Acc:HGNC:1603]                                                                     | 0.00082997 | 0.01429496 | 0.62233716 |
| ENSG00000163220 | S100A9   | S100 calcium binding protein A9 [Source:HGNC Symbol;Acc:HGNC:10499]                                                                   | 1.38E-07   | 7.39E-05   | 1.63614409 |
| ENSG00000168610 | STAT3    | signal transducer and activator of transcription 3 [Source:HGNC Symbol;Acc:HGNC:11364]                                                | 3.16E-07   | 0.00012453 | 0.81921988 |
| ENSG00000165168 | CYBB     | cytochrome b-245 beta chain [Source:HGNC Symbol;Acc:HGNC:2578]                                                                        | 2.26E-05   | 0.00154798 | 0.50282461 |
| ENSG00000136634 | IL10     | interleukin 10 [Source:HGNC Symbol;Acc:HGNC:5962]                                                                                     | 0.00047859 | 0.01029886 | 1.2355798  |
| ENSG00000125384 | PTGER2   | prostaglandin E receptor 2 [Source:HGNC Symbol;Acc:HGNC:9594]                                                                         | 0.00054456 | 0.0110989  | 0.90132869 |
| ENSG00000163221 | S100A12  | S100 calcium binding protein A12 [Source:HGNC Symbol;Acc:HGNC:10489]                                                                  | 0.00025289 | 0.00683886 | 1.24344981 |
| ENSG00000160791 | CCR5     | C-C motif chemokine receptor 5 (gene/pseudogene) [Source:HGNC Symbol;Acc:HGNC:1606]                                                   | 4.77E-05   | 0.00241612 | 1.12530733 |
| ENSG00000170458 | CD14     | CD14 molecule [Source:HGNC Symbol;Acc:HGNC:1628]                                                                                      | 0.0007962  | 0.0139324  | 0.65225493 |
| ENSG00000125538 | IL1B     | interleukin 1 beta [Source:HGNC Symbol;Acc:HGNC:5992]                                                                                 | 0.01035649 | 0.07225619 | 0.9626091  |
| ENSG00000073756 | PTGS2    | prostaglandin-endoperoxide synthase 2 [Source:HGNC Symbol;Acc:HGNC:9605]                                                              | 0.02402345 | 0.12330904 | 0.50030344 |
| ENSG00000196126 | HLA-DRB1 | major histocompatibility complex, class II, DR beta 1 [Source:HGNC Symbol;Acc:HGNC:4948]                                              | 0.02832988 | 0.13728513 | 0.31377178 |
| ENSG00000131203 | IDO1     | indoleamine 2,3-dioxygenase 1 [Source:HGNC Symbol;Acc:HGNC:6059]                                                                      | 0.01104881 | 0.07560173 | -1.7425979 |
| ENSG00000105329 | TGFB1    | transforming growth factor beta 1 [Source:HGNC Symbol;Acc:HGNC:11766]                                                                 | 0.02323542 | 0.1210483  | -0.2886977 |
| ENSG00000118520 | ARG1     | arginase 1 [Source:HGNC Symbol;Acc:HGNC:663]                                                                                          | NA         | NA         | NA         |
